# Supplementary material
Source: HighWire-hosted journal article supplement (https://erj.ersjournals.com/content/55/4/2000326)
Supplement: inline-supplementary-material-1 [file inline-supplementary-material-1.pdf]

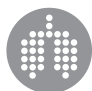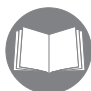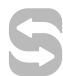

SHAREABLE PDF

# Vanishing vessels aboding pulmonary disease: a role for VEGFR2

Liza Botros, Anton Vonk Noordegraaf and Jurjan Aman

**Affiliation:** Dept of Pulmonary Diseases, Amsterdam University Medical Center, Location VU University Medical Center, Amsterdam, The Netherlands.

**Correspondence:** Jurjan Aman, Dept of Pulmonary Diseases, Amsterdam University Medical Center, Location VU University Medical Center, De Boelelaan 1117, 1081 HV Amsterdam, The Netherlands. E-mail: j.aman@amsterdamumc.nl

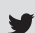

@ERSpublications

**VEGFR2 has a pivotal and specific role in vascular homeostasis and VEGFR2 mutations provide robust clinical evidence for direct involvement of a disturbed vasculature in a wide variety of lung diseases** <http://bit.ly/383ixTb>

**Cite this article as:** Botros L, Vonk Noordegraaf A, Aman J. Vanishing vessels aboding pulmonary disease: a role for VEGFR2. *Eur Respir J* 2020; 55: 2000326 [<https://doi.org/10.1183/13993003.00326-2020>].

This single-page version can be shared freely online.

There is growing recognition for the involvement of blood vessels in pulmonary diseases beyond the classical scope of pulmonary vascular medicine. As an example, reports have described a vascular phenotype of COPD, or have proposed a vanishing pulmonary capillary syndrome to underly emphysema [1, 2]. Although the number of clinical and epidemiological studies supporting such a vascular hypothesis of pulmonary disease is steadily growing, biological underpinning in clinical studies remains to be provided.
